# Supplementary material
Source: PubMed Central journal article supplement (PMC5880251)
Supplement: EHP577.s001.acco.pdf [file EHP577.s001.acco.pdf]

**Note to readers with disabilities:** *EHP* strives to ensure that all journal content is accessible to all readers. However, some figures and Supplemental Material published in *EHP* articles may not conform to [508 standards](#) due to the complexity of the information being presented. If you need assistance accessing journal content, please contact [ehponline@niehs.nih.gov](mailto:ehponline@niehs.nih.gov). Our staff will work with you to assess and meet your accessibility needs within 3 working days.

## **Supplemental Material**

# **The Association of Arsenic Metabolism with Cancer, Cardiovascular Disease and Diabetes: A Systematic Review of the Epidemiological Evidence**

Chin-Chi Kuo, Katherine A. Moon, Shu-Li Wang, Ellen Silbergeld, and Ana Navas-Acien

### **Table of Contents**

PubMed and EMBASE database search strategies for arsenic metabolism and outcomes of interest

Medline/PubMed (Jan 25, 2016)

EMBASE (Jan 25, 2016)

**Figure S1.** Flow diagram of study selection process.

**Table S1.** Quality criteria applied and evaluation of the design and data analysis issued in selected studies on the relation between arsenic metabolism and cancers.

**Table S2.** Quality criteria applied and evaluation of the design and data analysis issued in selected studies on the relation between arsenic metabolism and cardiovascular diseases.

**Table S3.** Quality criteria applied and evaluation of the design and data analysis issued in selected studies on the relation between arsenic metabolism and metabolic syndrome and diabetes.

**Figure S2.** Variability of arsenic metabolism biomarkers in the study populations after excluding studies without direct measurement of arsenic exposure(Li et al. 2013a; Melak et al. 2014; Steinmaus et al. 2006)

References

## PubMed and EMBASE database search strategies for arsenic metabolism and outcomes of interest

### Medline/PubMed (Jan 25, 2016):

**Strategy:** We combined the results for three major concepts (#1 to #3 below using “AND”) with restriction to human studies (#4 using “NOT”).

**#1. Arsenic [32,451 results]:** "Arsenic"[Mesh] OR "Arsenic Poisoning"[Mesh] OR "Arsenicals"[Mesh] OR "Arsenic"[tw] OR "Arsenic Poisoning"[tw] OR "Arsenicals"[tw] OR arsenite OR arsenate OR arsenicals

**#2. Metabolism [6,801,179 results]:** "Metabolism"[Mesh] OR "metabolism" [Subheading] OR "Metabolic Networks and Pathways"[Mesh] OR "Carbohydrate Metabolism"[Mesh] OR "Lipid Metabolism"[Mesh] OR "Glucose Metabolism Disorders"[Mesh] OR "Secondary Metabolism"[Mesh] OR "Lipid Metabolism Disorders"[Mesh] OR "Pyruvate Metabolism, Inborn Errors"[Mesh] OR "Purine-Pyrimidine Metabolism, Inborn Errors"[Mesh] OR "Phosphorus Metabolism Disorders"[Mesh] OR "Metal Metabolism, Inborn Errors"[Mesh] OR "Amino Acid Metabolism, Inborn Errors"[Mesh] OR "Steroid Metabolism, Inborn Errors"[Mesh] OR "Iron Metabolism Disorders"[Mesh] OR "Metabolism, Inborn Errors"[Mesh] OR "Lipid Metabolism, Inborn Errors"[Mesh] OR "Energy Metabolism"[Mesh] OR "Carbohydrate Metabolism, Inborn Errors"[Mesh] OR "Calcium Metabolism Disorders"[Mesh] OR "Methylation"[Mesh] OR "DNA Methylation"[Mesh] OR “Arsenic metabolism” OR “Arsenic methylation”

**#3. Health outcome measures [8,091,941 results]: [Cancer] cancer[*sb*] OR [Cardiovascular diseases] "Atherosclerosis"[Mesh] OR "Carotid Artery Diseases"[Mesh] OR "Coronary Artery Disease"[Mesh] OR "Cardiovascular Diseases"[Mesh] OR "Myocardial Infarction"[Mesh] OR "Stroke"[Mesh] OR "Cerebrovascular Disorders"[Mesh] OR "Peripheral Vascular Diseases"[Mesh] OR "Peripheral Arterial Disease"[Mesh] OR "Mortality"[Mesh] OR atherosclerosis OR arteriosclerosis OR "cardiovascular disease" OR “cardiovascular diseases” OR**

"myocardial infarction" OR stroke OR "cerebrovascular disease" OR "peripheral vascular disease" OR "peripheral arterial disease" OR mortality OR "blackfoot disease" OR "infarct\*" OR "ischemia" OR "ischemic heart disease" OR "heart diseases" OR **[Diabetes related outcome]** "obesity"[mh] OR "body mass index"[mh] OR "weight gain"[mh] OR "adipogenesis"[mh] OR "adipose tissue"[mh] OR "adipokines"[mh] OR "adiponectin"[mh] OR "leptin"[mh] OR resistin[mh]) OR ("diabetes mellitus"[mh] OR "glucose metabolism disorders"[mh] OR "insulin"[mh] OR "insulin resistance"[mh] OR "blood glucose"[mh] OR "islets of langerhans"[mh]) OR "body composition"

**#4. Animal Study [4,188,771 results]:** ["animals"[MeSH Terms] NOT ("humans"[MeSH Terms] AND "animals"[MeSH Terms])]

#### **EMBASE (Jan 25, 2016):**

**Strategy:** We combined the results for three major concepts (#1 to #3 below using "AND") with restriction to human studies (#4 using "NOT").

**#1. Arsenic [27,218 results]:** 'arsenic'/exp OR 'arsenic poisoning'/exp OR arsenic AND poisoning OR 'arsenicals'/exp OR arsenicals OR arsenite OR arsenate

**#2. Metabolism [4,589,864 results]:** 'metabolism'/exp OR metabolism OR 'methylation'/exp OR methylation OR 'arsenic methylatoxin' OR 'arsenic metabolism'

**#3. Health outcome measures [8,997,148 results]:** **[Cancer]**'cancer'/exp OR cancer OR 'neoplasm'/exp OR neoplasm OR 'malignancy' OR 'malignant' OR **[Cardiovascular diseases]** 'carotid artery diseases'/exp OR 'carotid artery diseases' OR 'coronary artery disease'/exp OR 'coronary artery disease' OR 'cardiovascular diseases'/exp OR 'cardiovascular diseases' OR 'myocardial infarction' OR 'myocardial infarction'/exp OR stroke OR 'stroke'/exp OR 'stroke' OR 'cerebrovascular disorders' OR 'cerebrovascular disorders'/exp OR 'peripheral vascular diseases' OR 'peripheral vascular diseases'/exp OR 'peripheral arterial diseases' OR 'peripheral arterial

diseases'/exp OR 'mortality' OR 'mortality'/exp OR 'atherosclerosis'/exp OR 'atherosclerosis' OR atherosclerosis OR 'arteriosclerosis'/exp OR 'arteriosclerosis' OR arteriosclerosis OR 'blackfoot disease'/exp OR 'blackfoot disease' OR 'infarct'/exp OR 'infarct' OR infarct OR 'ischemia'/exp OR 'ischemia' OR ischemia OR 'ischemic heart disease'/exp OR 'ischemic heart disease' OR 'heart disease'/exp OR 'heart disease' OR **[Diabetes related outcome]** 'diabetes' OR 'diabetes'/exp OR diabetes OR 'obesity' OR 'obesity'/exp OR obesity OR 'body mass index'/exp OR 'body mass index' OR 'weight gain'/exp OR 'weight gain' OR 'adipogenesis' OR 'adipogenesis'/exp OR adipogenesis OR 'adipose tissue'/exp OR 'adipose tissue' OR 'adipokines' OR 'adipokines'/exp OR adipokines OR 'adiponectin' OR 'adiponectin'/exp OR adiponectin OR 'leptin' OR 'leptin'/exp OR leptin OR 'resistin' OR 'resistin'/exp OR resistin OR 'glucose metabolism disorders'/exp OR 'glucose metabolism disorders' OR 'insulin' OR 'insulin'/exp OR insulin OR 'insulin resistance'/exp OR 'insulin resistance' OR 'blood glucose'/exp OR 'blood glucose' OR 'islets of langerhans'/exp OR 'islets of langerhans' OR 'body composition'/exp OR 'body composition'

**#4. Animal Study [4,588,327 results]:** 'animal'/exp NOT ('animal'/exp AND 'human'/exp)

**Figure S1. Flow diagram of study selection process.**

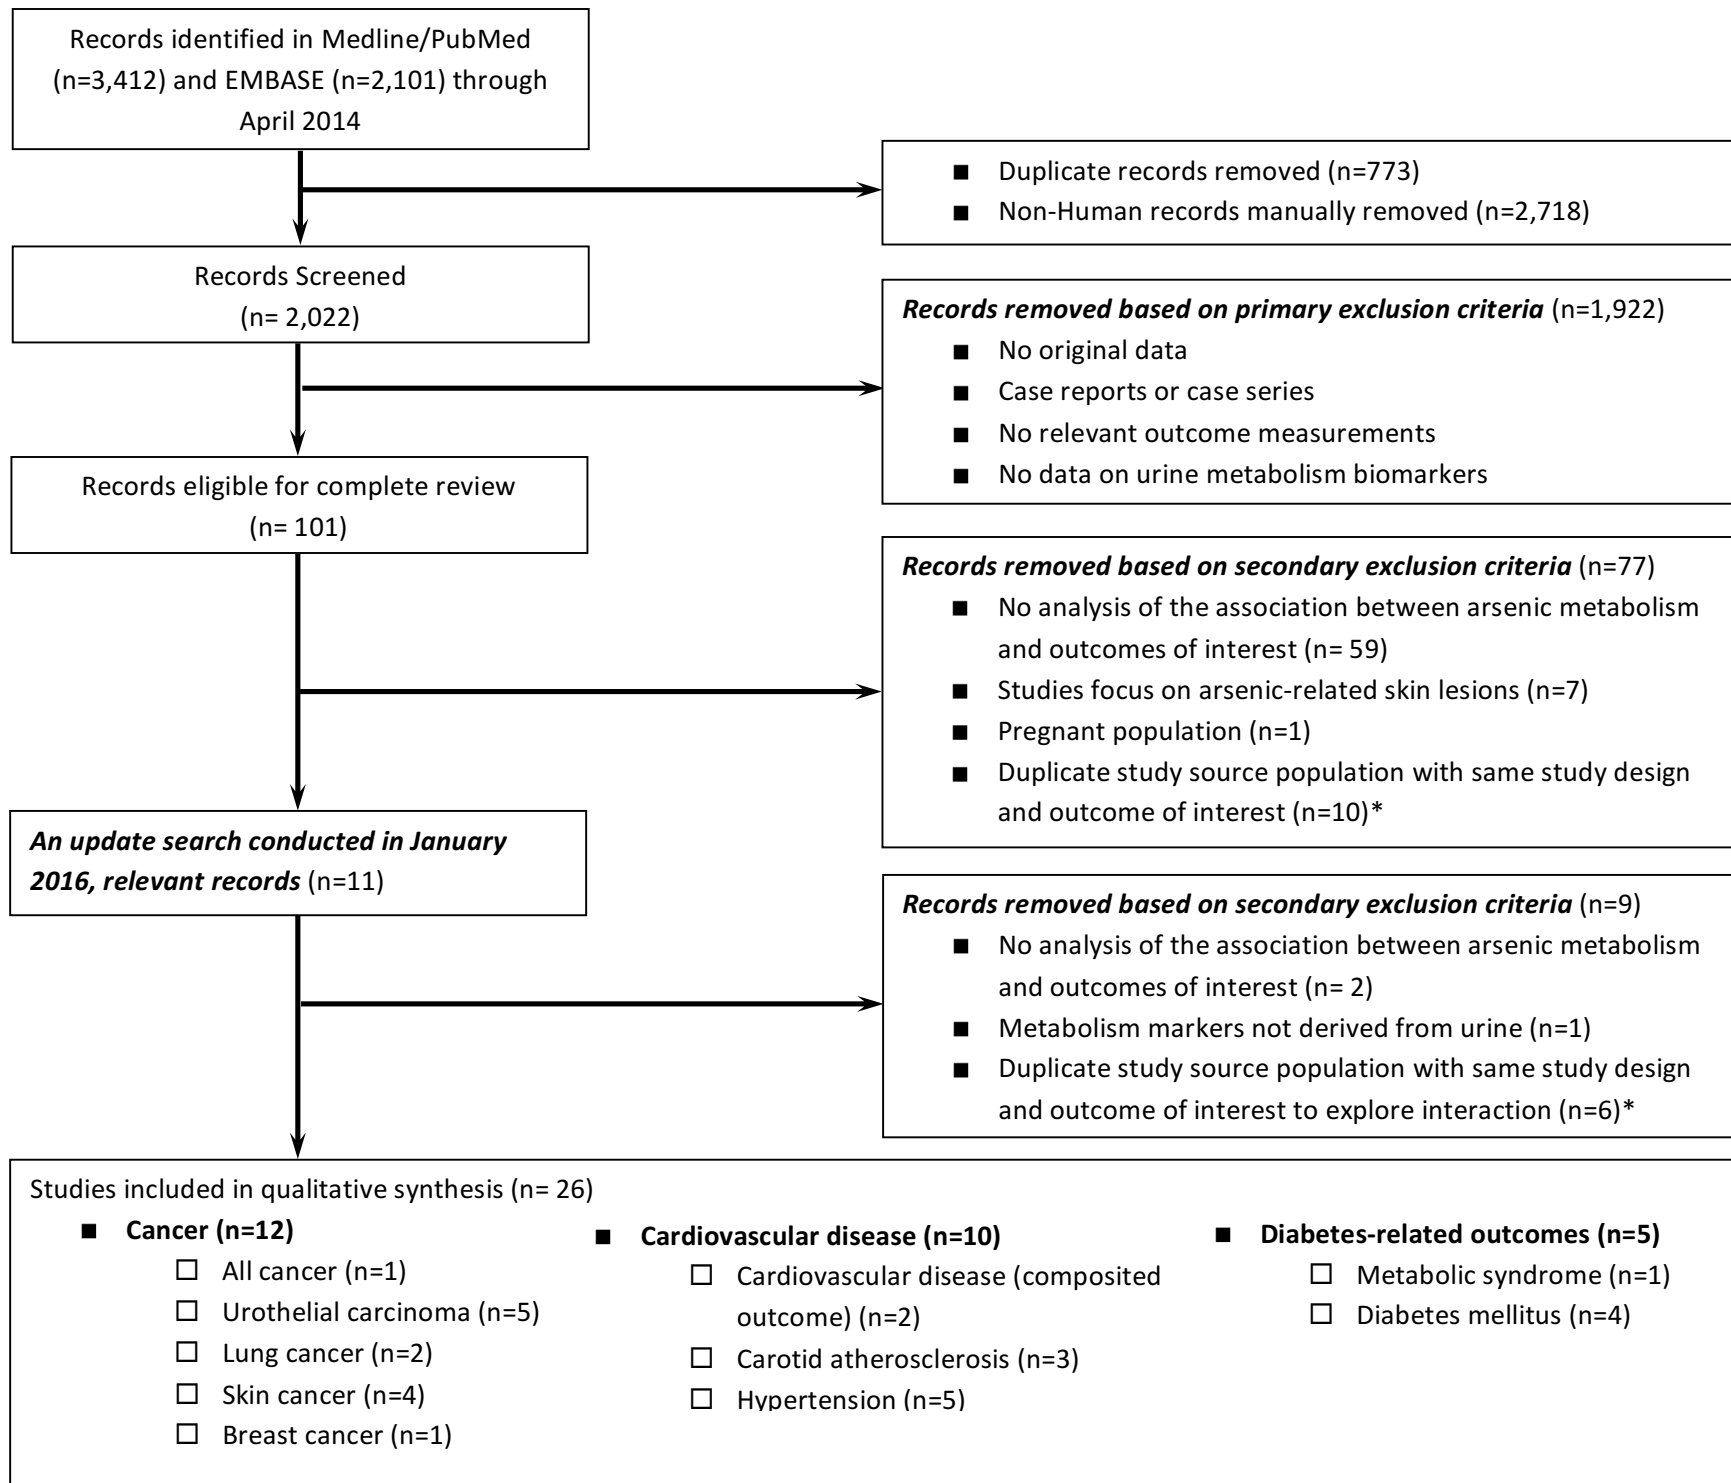

**Table S1.** Quality criteria applied and evaluation of the design and data analysis issued in selected studies on the relation between arsenic metabolism and cancers.

Note: Y: Yes; N: No; —: No relevant to the study design.

**Quality Criteria**

**All studies**

- Did the authors report all proportions of arsenic metabolism?
- Did the authors report both primary and secondary arsenic methylation indices ?
- Were outcomes based on objective tests or standard criteria in  $\geq 90\%$  of study participants?
- Did the authors present internal comparisons within study participants?
- Did the authors control for potential confounding risk factors at least including age, sex, and smoking?
- Did the authors control for total arsenic exposure?

**Follow-up studies**

- Was loss to follow up independent of exposure?
- Was the intensity of search of disease independent of exposure status?

**Case-control and cross-sectional studies?**

- Were the data collected in a similar manner for all participants?
- Were the same exclusion criteria applied to all participants?
- Was the time period over which cases and noncases or exposed and nonexposed participants were interviewed the same?
- Was the interviewer blinded with respect to the case status of the person interviewed?
- Was the response rate among non-cases at least 70%?
- Were all cases interviewed within 6 months of diagnosis?
- Was the study based on incident cases of diseases?
- Were noncases people who, had they developed the disease, would have been cases?

|                                                                                                                     | <i>Chung et al. 2009</i> | <i>Chen et al. 2003b</i> | <i>Steinmaus et al. 2006</i> | <i>Pu et al. 2007</i> | <i>Huang et al. 2008</i> | <i>Melak et al. 2014</i> | <i>Steinmaus et al. 2010</i> | <i>Hsueh et al. 1997</i> | <i>Yu et al. 2000</i> | <i>Chen et al. 2003a</i> | <i>Gilbert-Diamond et al. 2013</i> | <i>Lopez-Carrillo et al. 2014</i> |
|---------------------------------------------------------------------------------------------------------------------|--------------------------|--------------------------|------------------------------|-----------------------|--------------------------|--------------------------|------------------------------|--------------------------|-----------------------|--------------------------|------------------------------------|-----------------------------------|
| Did the authors report all proportions of arsenic metabolism?                                                       | Y                        | N                        | Y                            | Y                     | Y                        | Y                        | Y                            | Y                        | Y                     | Y                        | Y                                  | Y                                 |
| Did the authors report both primary and secondary arsenic methylation indices ?                                     | N                        | Y                        | N                            | Y                     | Y                        | N                        | N                            | Y                        | N                     | Y                        | Y                                  | Y                                 |
| Were outcomes based on objective tests or standard criteria in $\geq 90\%$ of study participants?                   | N                        | Y                        | Y                            | Y                     | N                        | Y                        | Y                            | Y                        | Y                     | Y                        | Y                                  | Y                                 |
| Did the authors present internal comparisons within study participants?                                             | Y                        | Y                        | Y                            | Y                     | Y                        | Y                        | Y                            | Y                        | Y                     | Y                        | Y                                  | Y                                 |
| Did the authors control for potential confounding risk factors at least including age, sex, and smoking?            | N                        | Y                        | Y                            | N                     | Y                        | Y                        | Y                            | N                        | N                     | Y                        | Y                                  | Y                                 |
| Did the authors control for total arsenic exposure?                                                                 | N                        | Y                        | N                            | N                     | Y                        | N                        | Y                            | N                        | N                     | Y                        | Y                                  | Y                                 |
| Was loss to follow up independent of exposure?                                                                      | N                        | —                        | —                            | —                     | N                        | —                        | —                            | Y                        | —                     | —                        | —                                  | —                                 |
| Was the intensity of search of disease independent of exposure status?                                              | Y                        | —                        | —                            | —                     | Y                        | —                        | —                            | Y                        | —                     | —                        | —                                  | —                                 |
| Were the data collected in a similar manner for all participants?                                                   | —                        | Y                        | Y                            | Y                     | —                        | Y                        | Y                            | —                        | Y                     | Y                        | Y                                  | Y                                 |
| Were the same exclusion criteria applied to all participants?                                                       | —                        | Y                        | Y                            | Y                     | —                        | Y                        | Y                            | —                        | Y                     | Y                        | Y                                  | Y                                 |
| Was the time period over which cases and noncases or exposed and nonexposed participants were interviewed the same? | —                        | Y                        | N                            | N                     | —                        | N                        | N                            | —                        | N                     | Y                        | Y                                  | Y                                 |
| Was the interviewer blinded with respect to the case status of the person interviewed?                              | —                        | N                        | N                            | N                     | —                        | N                        | N                            | —                        | N                     | N                        | Y                                  | N                                 |
| Was the response rate among non-cases at least 70%?                                                                 | —                        | Y                        | N                            | N                     | —                        | N                        | N                            | —                        | N                     | Y                        | Y                                  | Y                                 |
| Were all cases interviewed within 6 months of diagnosis?                                                            | —                        | N                        | N                            | N                     | —                        | N                        | N                            | —                        | N                     | N                        | N                                  | Y                                 |
| Was the study based on incident cases of diseases?                                                                  | —                        | Y                        | Y                            | N                     | —                        | N                        | Y                            | —                        | N                     | Y                        | Y                                  | Y                                 |
| Were noncases people who, had they developed the disease, would have been cases?                                    | —                        | N                        | Y                            | N                     | —                        | Y                        | Y                            | —                        | N                     | N                        | Y                                  | Y                                 |

**Table S2.** Quality criteria applied and evaluation of the design and data analysis issued in selected studies on the relation between arsenic metabolism and cardiovascular diseases. Note: Y: Yes; N: No; —: No relevant to the study design.

**Quality Criteria**

**All studies**

- Did the authors report all proportions of arsenic metabolism?
- Did the authors report both primary and secondary arsenic methylation indices?
- Were outcomes based on objective tests or standard criteria in  $\geq 90\%$  of study participants?
- Did the authors present internal comparisons within study participants?
- Did the authors control for potential confounding risk factors at least including age, sex, and smoking?
- Did the authors control for total arsenic exposure?

**Follow-up studies**

- Was loss to follow up independent of exposure?
- Was the intensity of search of disease independent of exposure status?

**Case-control and cross-sectional studies**

- Were the data collected in a similar manner for all participants?
- Were the same exclusion criteria applied to all participants?
- Was the time period over which cases and noncases or exposed and nonexposed participants were interviewed the same?
- Was the interviewer blinded with respect to the case status of the person interviewed?
- Was the response rate among eligible participants or non-cases at least 70%?
- Were all cases interviewed within 6 months of diagnosis?
- Was the study based on incident cases of diseases?
- Were noncases people who, had they developed the disease, would have been cases?

|                                                                                                                     | <i>Moon et al.</i><br>2013 | <i>Chen et al.</i><br>2013b | <i>Wu et al.</i><br>2006 | <i>Huang et al.</i><br>2009 | <i>Chen et al.</i><br>2013a | <i>Huang et al.</i><br>2007 | <i>Wang et al.</i><br>2011 | <i>Li et al.</i><br>2013a | <i>Li et al.</i><br>2013b | <i>Mendez et al.</i><br>2016 |
|---------------------------------------------------------------------------------------------------------------------|----------------------------|-----------------------------|--------------------------|-----------------------------|-----------------------------|-----------------------------|----------------------------|---------------------------|---------------------------|------------------------------|
| Did the authors report all proportions of arsenic metabolism?                                                       | Y                          | Y                           | N                        | Y                           | Y                           | Y                           | N                          | Y                         | Y                         | Y                            |
| Did the authors report both primary and secondary arsenic methylation indices?                                      | Y                          | Y                           | N                        | Y                           | Y                           | Y                           | N                          | N                         | N                         | N                            |
| Were outcomes based on objective tests or standard criteria in $\geq 90\%$ of study participants?                   | Y                          | Y                           | Y                        | Y                           | Y                           | Y                           | Y                          | Y                         | Y                         | Y                            |
| Did the authors present internal comparisons within study participants?                                             | Y                          | Y                           | Y                        | Y                           | Y                           | Y                           | Y                          | Y                         | Y                         | Y                            |
| Did the authors control for potential confounding risk factors at least including age, sex, and smoking?            | Y                          | Y                           | Y                        | Y                           | Y                           | Y                           | N                          | Y                         | Y                         | Y                            |
| Did the authors control for total arsenic exposure?                                                                 | Y                          | Y                           | Y                        | Y                           | N                           | Y                           | N                          | N                         | N                         | Y                            |
| <b>Follow-up studies</b>                                                                                            | Y                          | Y                           | Y                        |                             |                             |                             |                            |                           |                           |                              |
| Was loss to follow up independent of exposure?                                                                      | Y                          | Y                           | Y                        | —                           | —                           | —                           | N                          | —                         | —                         | —                            |
| Was the intensity of search of disease independent of exposure status?                                              | Y                          | Y                           | Y                        | —                           | —                           | —                           | Y                          | —                         | —                         | —                            |
| <b>Case-control and cross-sectional studies</b>                                                                     |                            |                             | Y                        |                             |                             |                             |                            |                           |                           |                              |
| Were the data collected in a similar manner for all participants?                                                   | —                          | —                           | Y                        | Y                           | Y                           | Y                           | —                          | Y                         | Y                         | Y                            |
| Were the same exclusion criteria applied to all participants?                                                       | —                          | —                           | Y                        | Y                           | Y                           | Y                           | —                          | Y                         | Y                         | Y                            |
| Was the time period over which cases and noncases or exposed and nonexposed participants were interviewed the same? | —                          | —                           | Y                        | Y                           | Y                           | Y                           | —                          | Y                         | Y                         | Y                            |
| Was the interviewer blinded with respect to the case status of the person interviewed?                              | —                          | —                           | N                        | —                           | —                           | —                           | —                          | —                         | —                         | —                            |
| Was the response rate among eligible participants or non-cases at least 70%?                                        | —                          | —                           | Y                        | N                           | Y                           | N                           | —                          | Y                         | Y                         | N                            |
| Were all cases interviewed within 6 months of diagnosis?                                                            | —                          | —                           | N                        | —                           | —                           | —                           | —                          | —                         | —                         | —                            |
| Was the study based on incident cases of diseases?                                                                  | —                          | —                           | N                        | —                           | —                           | —                           | —                          | —                         | —                         | —                            |
| Were noncases people who, had they developed the disease, would have been cases?                                    | —                          | —                           | Y                        | —                           | —                           | —                           | —                          | —                         | —                         | —                            |

**Table S3.** Quality criteria applied and evaluation of the design and data analysis issued in selected studies on the relation between arsenic metabolism and metabolic syndrome and diabetes. Note: Y: Yes; N: No; —: No relevant to the study design.

**Quality Criteria**

**All studies**

- Did the authors report all proportions of arsenic metabolism?
- Did the authors report both primary and secondary arsenic methylation indices ?
- Were outcomes based on objective tests or standard criteria in  $\geq 90\%$  of study participants?
- Did the authors present internal comparisons within study participants?
- Did the authors control for potential confounding risk factors at least including Age and sex?
- Did the authors control for total arsenic exposure?

**Follow-up studies**

- Was loss to follow up independent of exposure?
- Was the intensity of search of disease independent of exposure status?

**Case-control and cross-sectional studies**

- Were the data collected in a similar manner for all participants?
- Were the same exclusion criteria applied to all participants?
- Was the time period over which cases and noncases or exposed and nonexposed participants were interviewed the same?
- Was the interviewer blinded with respect to the case status of the person interviewed?
- Was the response rate among eligible participants or non-cases at least 70%?
- Were all cases interviewed within 6 months of diagnosis?
- Was the study based on incident cases of diseases?
- Were noncases people who, had they developed the disease, would have been cases?

|                                                                                                                     | Chen et al.<br>2012 | Del Razo et al.<br>2011 | Nizam et al.<br>2013 | Kuo et al.<br>2015 | Mendez et al.<br>2016 |
|---------------------------------------------------------------------------------------------------------------------|---------------------|-------------------------|----------------------|--------------------|-----------------------|
| Did the authors report all proportions of arsenic metabolism?                                                       | Y                   | N                       | Y                    | Y                  | Y                     |
| Did the authors report both primary and secondary arsenic methylation indices ?                                     | Y                   | Y                       | Y                    | Y                  | N                     |
| Were outcomes based on objective tests or standard criteria in $\geq 90\%$ of study participants?                   | Y                   | Y                       | Y                    | Y                  | Y                     |
| Did the authors present internal comparisons within study participants?                                             | Y                   | Y                       | Y                    | Y                  | Y                     |
| Did the authors control for potential confounding risk factors at least including Age and sex?                      | N                   | Y                       | Y                    | Y                  | Y                     |
| Did the authors control for total arsenic exposure?                                                                 | N                   | N                       | Y                    | Y                  | Y                     |
| Was loss to follow up independent of exposure?                                                                      | —                   | —                       | —                    | Y                  | —                     |
| Was the intensity of search of disease independent of exposure status?                                              | —                   | —                       | —                    | Y                  | —                     |
| Were the data collected in a similar manner for all participants?                                                   | Y                   | Y                       | Y                    | —                  | Y                     |
| Were the same exclusion criteria applied to all participants?                                                       | Y                   | Y                       | Y                    | —                  | Y                     |
| Was the time period over which cases and noncases or exposed and nonexposed participants were interviewed the same? | Y                   | Y                       | Y                    | —                  | Y                     |
| Was the interviewer blinded with respect to the case status of the person interviewed?                              | —                   | —                       | N                    | —                  | —                     |
| Was the response rate among eligible participants or non-cases at least 70%?                                        | —                   | N                       | N                    | —                  | N                     |
| Were all cases interviewed within 6 months of diagnosis?                                                            | —                   | —                       | N                    | —                  | —                     |
| Was the study based on incident cases of diseases?                                                                  | —                   | —                       | N                    | —                  | —                     |
| Were noncases people who, had they developed the disease, would have been cases?                                    | Y                   | —                       | Y                    | —                  | —                     |



**Figure S2. Variability of arsenic metabolism biomarkers in the study populations after excluding studies without direct measurement of arsenic exposure (Li et al. 2013a; Melak et al. 2014; Steinmaus et al. 2006)** Top panel: The distribution of each arsenic metabolism biomarker (iAs%, MMA%, DMA%) is plotted for each study listed in increasing order (from bottom to top) of the estimated urine arsenic levels in (eAs,  $\mu\text{g/L}$ ) in the study area. Middle panel, violin plot showing the median (hollow circle) with interquartile range (horizontal bar) and the kernel probability density for each arsenic metabolism biomarker (iAs%, MMA%, DMA%) across all studies. Bottom panel, the prediction curve (line) (right for iAs%, central for MMA%, and left for DMA%) derived from the compositional regression of each arsenic metabolism biomarker based on estimated urine arsenic levels (eAs,  $\mu\text{g/L}$ ). The right increasing curve supports that iAs% increases as eAs increases and the left decreasing curve supports that DMA% decreases as eAs increases. The central curve supports that MMA% does not change with changes in eAs concentrations as the line is vertical.

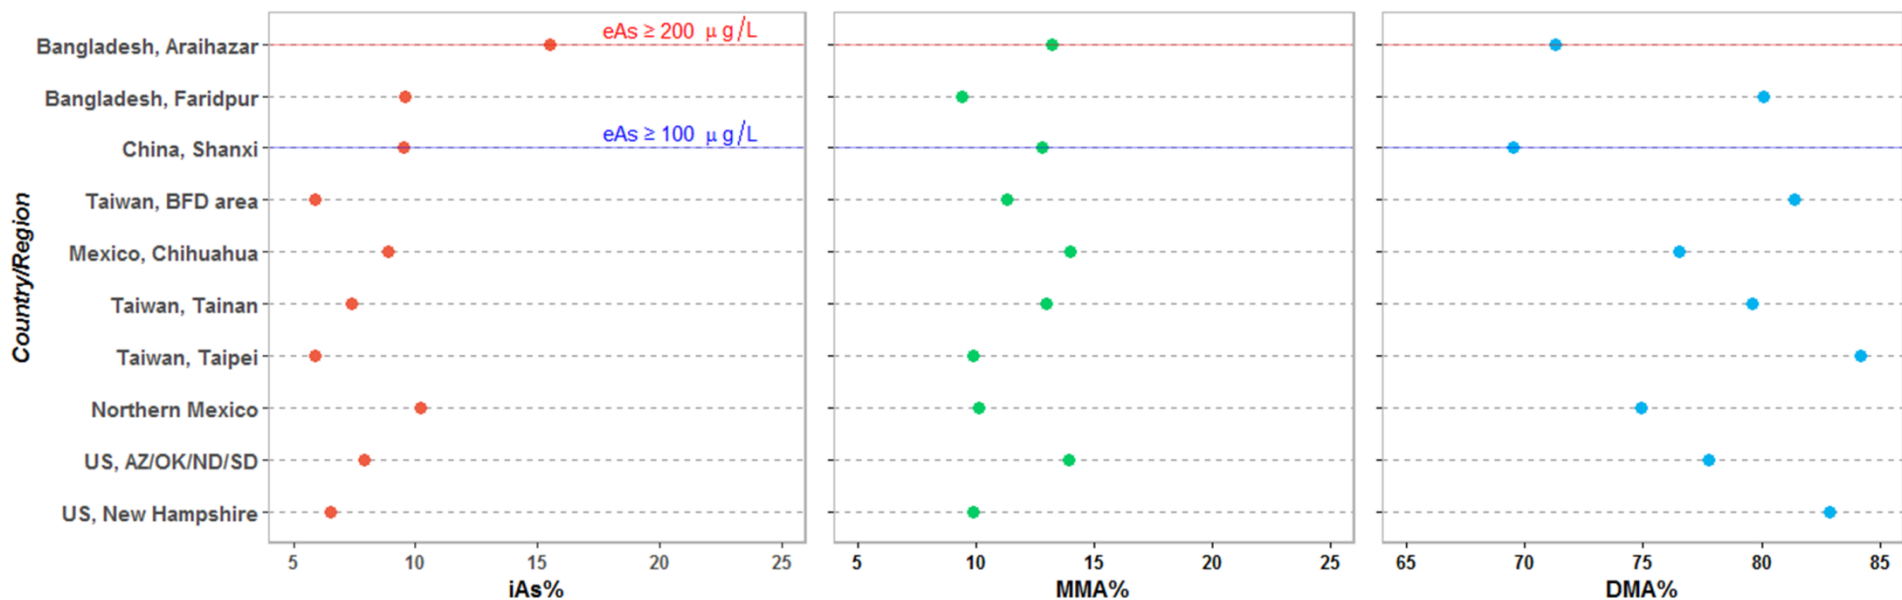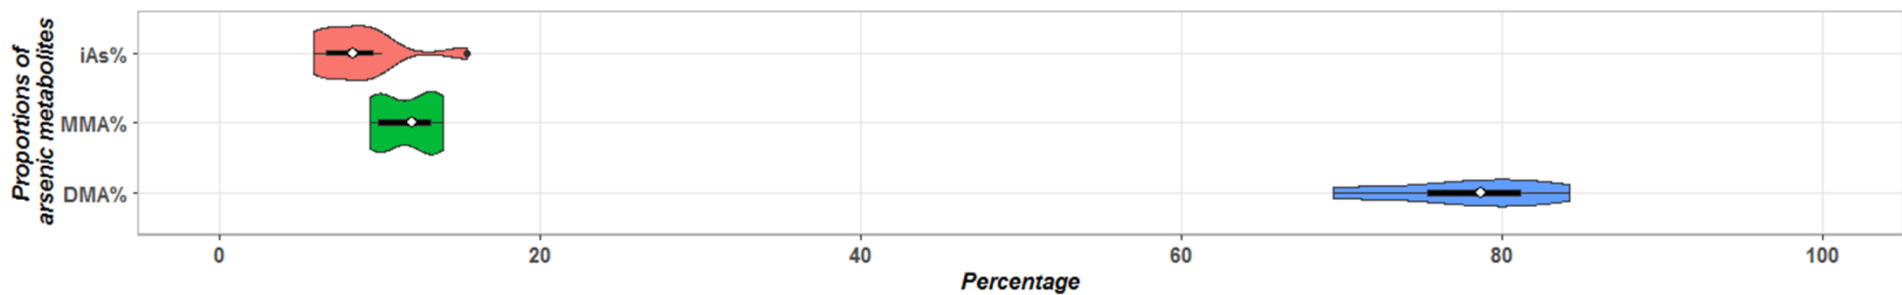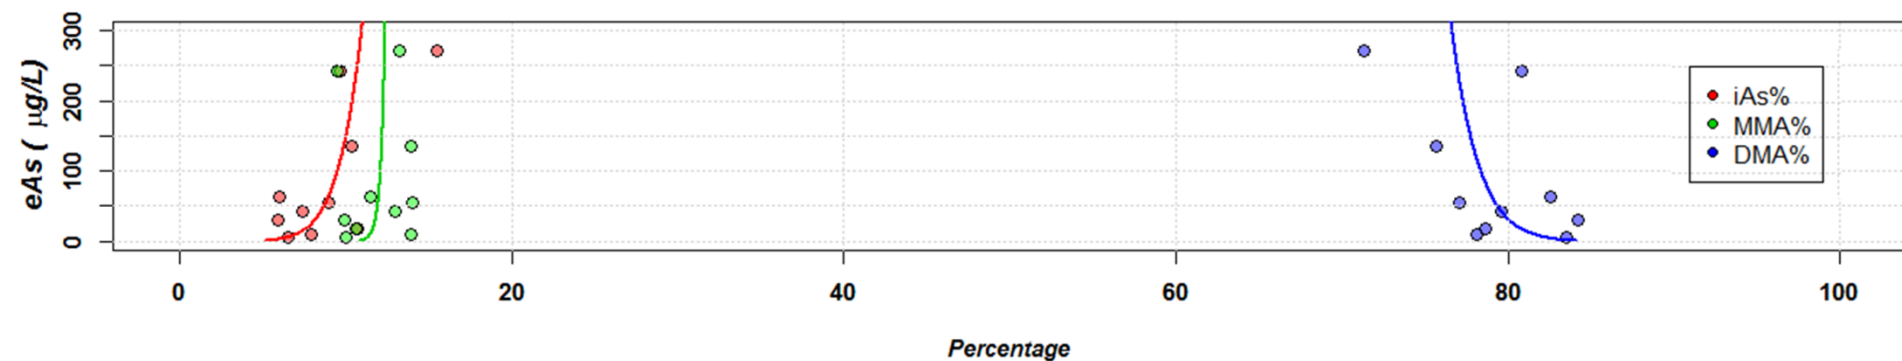

## References:

Chen JW, Wang SL, Wang YH, Sun CW, Huang YL, Chen CJ, et al. 2012. Arsenic methylation, gsto1 polymorphisms, and metabolic syndrome in an arseniasis endemic area of southwestern taiwan. *Chemosphere* 88:432-438.

Chen Y, Wu F, Graziano JH, Parvez F, Liu M, Paul RR, et al. 2013a. Arsenic exposure from drinking water, arsenic methylation capacity, and carotid intima-media thickness in bangladesh. *American journal of epidemiology* 178:372-381.

Chen Y, Wu F, Liu M, Parvez F, Slavkovich V, Eunus M, et al. 2013b. A prospective study of arsenic exposure, arsenic methylation capacity, and risk of cardiovascular disease in bangladesh. *Environmental health perspectives* 121:832-838.

Chen YC, Guo YL, Su HJ, Hsueh YM, Smith TJ, Ryan LM, et al. 2003a. Arsenic methylation and skin cancer risk in southwestern taiwan. *Journal of occupational and environmental medicine / American College of Occupational and Environmental Medicine* 45:241-248.

Chen YC, Su HJ, Guo YL, Hsueh YM, Smith TJ, Ryan LM, et al. 2003b. Arsenic methylation and bladder cancer risk in taiwan. *Cancer causes & control : CCC* 14:303-310.

Chung CJ, Hsueh YM, Bai CH, Huang YK, Huang YL, Yang MH, et al. 2009. Polymorphisms in arsenic metabolism genes, urinary arsenic methylation profile and cancer. *Cancer causes & control : CCC* 20:1653-1661.

Del Razo LM, Garcia-Vargas GG, Valenzuela OL, Castellanos EH, Sanchez-Pena LC, Currier JM, et al. 2011. Exposure to arsenic in drinking water is associated with increased prevalence of diabetes: A cross-sectional study in the zimapan and lagunera regions in mexico. *Environmental health : a global access science source* 10:73.

Gilbert-Diamond D, Li Z, Perry AE, Spencer SK, Gandolfi AJ, Karagas MR. 2013. A population-based case-control study of urinary arsenic species and squamous cell carcinoma in new hampshire, USA.

Environmental health perspectives 121:1154-1160.

Hsueh YM, Chiou HY, Huang YL, Wu WL, Huang CC, Yang MH, et al. 1997. Serum beta-carotene level, arsenic methylation capability, and incidence of skin cancer. Cancer epidemiology, biomarkers & prevention : a publication of the American Association for Cancer Research, cosponsored by the American Society of Preventive Oncology 6:589-596.

Huang YK, Tseng CH, Huang YL, Yang MH, Chen CJ, Hsueh YM. 2007. Arsenic methylation capability and hypertension risk in subjects living in arseniasis-hyperendemic areas in southwestern taiwan. Toxicology and applied pharmacology 218:135-142.

Huang YK, Huang YL, Hsueh YM, Yang MH, Wu MM, Chen SY, et al. 2008. Arsenic exposure, urinary arsenic speciation, and the incidence of urothelial carcinoma: A twelve-year follow-up study. Cancer causes & control : CCC 19:829-839.

Huang YL, Hsueh YM, Huang YK, Yip PK, Yang MH, Chen CJ. 2009. Urinary arsenic methylation capability and carotid atherosclerosis risk in subjects living in arsenicosis-hyperendemic areas in southwestern taiwan. The Science of the total environment 407:2608-2614.

Kuo CC, Howard BV, Umans JG, Gribble MO, Best LG, Francesconi KA, et al. 2015. Arsenic exposure, arsenic metabolism, and incident diabetes in the strong heart study. Diabetes Care 38:620-627.

Li X, Li B, Xi S, Zheng Q, Lv X, Sun G. 2013a. Prolonged environmental exposure of arsenic through drinking water on the risk of hypertension and type 2 diabetes. Environmental science and pollution research international 20:8151-8161.

Li X, Li B, Xi S, Zheng Q, Wang D, Sun G. 2013b. Association of urinary monomethylated arsenic concentration and risk of hypertension: A cross-sectional study from arsenic contaminated areas in northwestern china. Environmental health : a global access science source 12:37.

Lopez-Carrillo L, Hernandez-Ramirez RU, Gandolfi AJ, Ornelas-Aguirre JM, Torres-Sanchez L, Cebrian ME. 2014. Arsenic methylation capacity is associated with breast cancer in northern Mexico. *Toxicology and applied pharmacology* 280:53-59.

Melak D, Ferreccio C, Kalman D, Parra R, Acevedo J, Perez L, et al. 2014. Arsenic methylation and lung and bladder cancer in a case-control study in northern Chile. *Toxicology and applied pharmacology* 274:225-231.

Mendez MA, Gonzalez-Horta C, Sanchez-Ramirez B, Ballinas-Casarrubias L, Ceron RH, Morales DV, et al. 2016. Chronic exposure to arsenic and markers of cardiometabolic risk: A cross-sectional study in Chihuahua, Mexico. *Environmental health perspectives* 124:104-111.

Moon KA, Guallar E, Umans JG, Devereux RB, Best LG, Francesconi KA, et al. 2013. Association between exposure to low to moderate arsenic levels and incident cardiovascular disease. A prospective cohort study. *Annals of internal medicine* 159:649-659.

Nizam S, Kato M, Yatsuya H, Khalequzzaman M, Ohnuma S, Naito H, et al. 2013. Differences in urinary arsenic metabolites between diabetic and non-diabetic subjects in Bangladesh. *International journal of environmental research and public health* 10:1006-1019.

Pu YS, Yang SM, Huang YK, Chung CJ, Huang SK, Chiu AW, et al. 2007. Urinary arsenic profile affects the risk of urothelial carcinoma even at low arsenic exposure. *Toxicology and applied pharmacology* 218:99-106.

Steinmaus C, Bates MN, Yuan Y, Kalman D, Atallah R, Rey OA, et al. 2006. Arsenic methylation and bladder cancer risk in case-control studies in Argentina and the United States. *Journal of occupational and environmental medicine / American College of Occupational and Environmental Medicine* 48:478-488.

Steinmaus C, Yuan Y, Kalman D, Rey OA, Skibola CF, Dauphine D, et al. 2010. Individual differences in arsenic metabolism and lung cancer in a case-control study in cordoba, argentina. *Toxicology and applied pharmacology* 247:138-145.

Wang SL, Li WF, Chen CJ, Huang YL, Chen JW, Chang KH, et al. 2011. Hypertension incidence after tap-water implementation: A 13-year follow-up study in the arseniasis-endemic area of southwestern taiwan. *The Science of the total environment* 409:4528-4535.

Wu MM, Chiou HY, Hsueh YM, Hong CT, Su CL, Chang SF, et al. 2006. Effect of plasma homocysteine level and urinary monomethylarsonic acid on the risk of arsenic-associated carotid atherosclerosis. *Toxicology and applied pharmacology* 216:168-175.

Yu RC, Hsu KH, Chen CJ, Froines JR. 2000. Arsenic methylation capacity and skin cancer. *Cancer epidemiology, biomarkers & prevention : a publication of the American Association for Cancer Research, cosponsored by the American Society of Preventive Oncology* 9:1259-1262.
